1 **Classification**

2 Biological Sciences: Evolution, Microbiology

3 **Title**

4 Selection-driven cost-efficiency optimisation of transcript sequences determines the rate of  
5 gene sequence evolution in bacteria

6 **Short Title**

7 Selective constraints on bacterial gene evolution

8 **Authors**

9 Emily A. Seward<sup>1</sup>, Steven Kelly<sup>1</sup>

10 **Affiliations**

11 <sup>1</sup>Department of Plant Sciences, University of Oxford, South Parks Road, Oxford, OX1 3RB,  
12 UK

13 **ORCID iDs**

14 0000-0002-7869-0641, 0000-0001-8583-5362

15 **Corresponding Author**

16 Name: Steven Kelly

17 Email: [steven.kelly@plants.ox.ac.uk](mailto:steven.kelly@plants.ox.ac.uk)

18 Telephone: +44 (0)1865 275123

19 Address: Department of Plant Sciences, University of Oxford, South Parks Road, Oxford,  
20 OX1 3RB, UK

21 **Keywords**

22 Gene evolution, Synonymous codon use, Codon bias, Translational efficiency, Bacteria,  
23 natural selection, Transcript optimisation, molecular evolution

24 **Abstract**

25 Due to genetic redundancy, multiple synonymous codons can code for the same amino acid.  
26 However synonymous codons are not used equally and this biased codon use varies  
27 between different organisms. Through analysis of 1,320 bacterial genomes we show that  
28 bacteria are under genome-wide selection to reduce resource allocation to mRNA  
29 production. This is achieved by simultaneously decreasing transcript biosynthetic cost and  
30 increasing transcript translational efficiency, with highly expressed genes under the greatest  
31 selection. We show that tRNA gene copy number alters the cost-efficiency trade-off of  
32 synonymous codons such that for many species it is difficult to both minimise transcript cost  
33 and maximise transcript translational efficiency to an equal extent. Finally, we show that  
34 genes highly optimised to reduce cost and increase efficiency show reduced rates of  
35 synonymous and non-synonymous mutation. This provides a simple mechanistic  
36 explanation for variation in evolutionary rate between genes that depends on selection-  
37 driven cost-efficiency optimisation of the transcript. These findings reveal how optimisation  
38 of resource allocation to mRNA synthesis is a critical factor that determines both the  
39 evolution and composition of genes.

40 **Significance statement**

41 Resource limitation limits cell growth. In this work, we show that the simple economic  
42 principles of minimising cost and maximising efficiency of gene production are key drivers  
43 of molecular sequence evolution in bacteria. We demonstrate that natural selection has  
44 optimised the cost and efficiency of transcript sequences directly in proportion to their  
45 production demand. Furthermore, we show that selection-driven optimisation of the  
46 economics of gene production is a simple unifying mechanism that explains variation in the  
47 evolution and composition of genes as well as the correlation between synonymous and  
48 non-synonymous mutation rates.

## 49 **Introduction**

50 Production of proteins is a primary consumer of cell resources (1). It requires allocation of  
51 cellular resources to production of RNA sequences as well as allocation of resources to  
52 production of nascent polypeptide chains. Whilst a protein's amino acid sequence is  
53 functionally constrained, redundancy in the genetic code means that multiple nucleotide  
54 sequences can code for the same protein. Since the biosynthetic cost and translational  
55 efficiency of synonymous codons varies, biased use of synonymous codons makes it  
56 possible to reduce the expenditure of cellular resources on mRNA production without  
57 altering the encoded protein sequence. Thus, it is possible to reduce resource allocation to  
58 protein synthesis without altering the encoded protein or affecting protein abundance by  
59 reducing resource allocation to transcript sequences or by increasing the efficiency with  
60 which those transcripts can be translated into protein. Consistent with this, it has been  
61 demonstrated that natural selection acts both to reduce biosynthetic cost of RNA sequences  
62 (2, 3), and to increase in the efficiency with which those RNA sequences can template the  
63 encoded polypeptide chain (4–10). It should be noted here that biased patterns of codon  
64 use are also influenced by other factors not associated with cellular resource allocation.  
65 These factors include RNA structural constraints to facilitate thermal adaptation (11, 12),  
66 RNA sequence constraints to preserve splice sites (13), and translational constraints to  
67 ensure accurate protein folding (14, 15). These functional constraints are independent of  
68 resource allocation and are specific to individual sites or sets of sites within genes.

69 Cells employ different strategies to decode synonymous codons (16). These strategies  
70 make use of 'wobble' base pairing between the 3<sup>rd</sup> base of the codon and the 1<sup>st</sup> base of the  
71 anticodon to facilitate translation of all 61 sense codons using a reduced set of tRNAs. As  
72 the translational efficiency of a codon is a function of the number of tRNAs that can translate  
73 that codon, and as different species encode different subsets of tRNA genes, the same  
74 codon is not necessarily equally translationally efficient in all species. In contrast, the

75 biosynthetic cost of a codon of RNA is determined by the number and type of atoms  
76 contained within that codon and the number of high energy phosphate bonds required for  
77 their assembly. As translational efficiency varies between species but biosynthetic cost does  
78 not, it was hypothesised this must create a corresponding variation in the codon cost-  
79 efficiency trade-off between species. For example biosynthetically cheap codons might be  
80 translationally efficient in one species but inefficient in another. It was further hypothesised  
81 that variation in the codon cost-efficiency trade-off would limit the extent to which a transcript  
82 could be optimised to be both biosynthetically inexpensive and translationally efficient.

83 Here, we show that natural selection acts genome-wide to reduce cellular resource  
84 allocation to mRNA synthesis by solving the multi-objective optimisation problem of  
85 minimising transcript biosynthetic cost whilst simultaneously maximising transcript  
86 translational efficiency. We show that this optimisation is achieved irrespective of the codon  
87 cost-efficiency trade-off of a species, and that the extent to which resource allocation is  
88 optimised is a function of the production demand of that gene. Finally, we reveal that  
89 selection-driven optimisation of resource allocation provides a novel mechanistic  
90 explanation for differences in evolutionary rates between genes, and for the previously  
91 unexplained correlation in synonymous and non-synonymous mutation rates of genes.

## 92 **Results**

### 93 **55% of bacteria exhibit a significant trade-off between codon biosynthetic cost and** 94 **translational efficiency**

95 The biosynthetic cost of a codon is determined by the number and type of atoms contained  
96 within the codon, and the number of high energy phosphate bonds required for their  
97 assembly. Natural selection acting on biosynthetic cost, either in terms of nitrogen atoms (2)  
98 or energetic requirements (3), has been shown to play a role in promoting biased patterns  
99 of synonymous codon use. As the energy and nitrogen cost of a codon correlate almost  
100 perfectly (Figure 1A), it is not possible to distinguish which factor is responsible for biased

101 patterns of codon use in the absence of additional information about the biology of the  
102 organism in question. However, given the near perfect correlation, analysis of selection  
103 acting on overall codon biosynthetic cost can be approximated by analysis of either  
104 measure.

105 tRNA gene copy number varies between species resulting in a corresponding variation in  
106 the relative translational efficiency of their associated codons (16, 17). As the biosynthetic  
107 cost of a given codon is invariant, the relationship between codon biosynthetic cost and  
108 codon translational efficiency (referred to from here on as the codon cost-efficiency trade-  
109 off) must therefore vary between species. For example, a hypothetical species encoding a  
110 full complement of tRNAs, each present as a single copy, would have a negative correlation  
111 between cost and efficiency (Figure 1B). In contrast, a hypothetical species that employed  
112 tRNA sparing strategy 1 (no ANN tRNAs) or strategy 2 (no ANN or CNN tRNAs) (16), would  
113 show a positive (Figure 1C) or no (Figure 1D) correlation between cost and efficiency.  
114 Therefore, a broad range of codon cost-efficiency trade-offs is possible and the gradient of  
115 this trade-off is dependent on the tRNA gene copy number of a given species.

116 Few bacterial species strictly adhere to a single sparing strategy for all synonymous codon  
117 groups (e.g. *Escherichia coli* uses strategy 2 for decoding alanine but strategy 1 for decoding  
118 glycine), and thus it is anticipated that a continuum of gradients in trade-off between cost  
119 and efficiency are possible. To assess this, the codon cost-efficiency trade-off was  
120 calculated for 1,320 bacterial species representing 730 different genera (Figure 1E).  
121 Approximately 55% of species exhibited a significant codon cost-efficiency trade-off (Figure  
122 1E,  $p < 0.05$ ). Species with a significant negative correlation between cost and efficiency  
123 were not observed; instead, the remaining species exhibited non-significant correlations  
124 between codon cost and efficiency (Figure 1E, blue dots, ~45% of species). Thus for  
125 approximately half of the bacterial species in this analysis there is a significant codon cost-  
126 efficiency trade-off whereby resource allocation to mRNA can be reduced by decreasing

127 biosynthetic cost or increasing translational efficiency but not both simultaneously. This is  
128 because the synonymous codons that are most translationally efficient in these species are  
129 in general those that consume the most resources for biosynthesis.

130 **Selection acting to minimise biosynthetic cost and maximise translational efficiency**  
131 **of transcript sequences is independent of codon cost-efficiency trade-off**

132 Given that the codon cost-efficiency trade-off varied between species, an analysis was  
133 conducted to determine whether this trade-off was associated with concomitant differences  
134 in the strength of selection acting on the cost and efficiency of transcript sequences. For  
135 each species, genome-wide values for selection on transcript translational efficiency [ $S_t$ ] and  
136 selection on transcript biosynthetic cost [ $S_c$ ] were inferred using the complete set of open  
137 reading frames and tRNAs encoded in that species' genome using the SK model (2)  
138 implemented using CodonMuSe (see Methods). There was no significant difference in the  
139 mean or range of values for  $S_c$  between the groups of species that did or did not exhibit a  
140 significant codon cost-efficiency trade-off. Instead, irrespective of codon cost-efficiency  
141 trade-off 91% of species had negative  $S_c$  values (mean  $S_c = -0.08$ ), indicating a genome-  
142 wide selective pressure to minimise the biosynthetic cost of transcript sequences through  
143 synonymous codon use (Fig. 2). This observation extends previous studies that revealed  
144 analogous effects when nitrogen or energy were limited (2, 3). Thus irrespective of codon  
145 cost-efficiency trade-off, selection acting on codon biosynthetic cost is an important factor  
146 promoting biased patterns of codon use in bacteria.

147 Similarly, 78% of species had positive values for  $S_t$  (mean  $S_t = 0.1$ ), indicating a genome  
148 wide selective pressure to increase the translational efficiency of transcript sequences (Fig.  
149 2). However, species that had a significant codon cost-efficiency trade-off (Fig. 2A) had  $S_t$   
150 values that were significantly lower than those that had no trade-off (Fig. 2B,  $p < 0.05$ , t-  
151 test). Moreover, there was an increased variance in the observed values for both  $S_c$  and  $S_t$   
152 for species that exhibited a significant codon cost-efficiency trade-off compared to those

153 species that did not (Fig. 2A and 2B). Thus, in general the majority of species experience  
154 selection to minimise transcript biosynthetic cost while simultaneously maximising transcript  
155 translational efficiency. However, the nature of a species' codon cost-efficiency trade-off  
156 restricts a transcript's ability to be both cheap and translationally efficient thereby limiting the  
157 extent to which resource allocation to transcript sequences can be minimised.

158 **Genes that experience the strongest selection for increased transcript translational**  
159 **efficiency are also under the strongest selection to minimise biosynthetic cost**

160 Given that the majority of species exhibited selection to minimise cost and maximise  
161 translational efficiency at the genome-wide level, the extent to which this was also seen at  
162 the level of an individual gene within species was determined. Here, the strength of selection  
163 acting on transcript translational efficiency and strength of selection on transcript  
164 biosynthetic cost were inferred for each individual gene in each species. The relationship  
165 between these selection coefficients was then compared for each species. For example, in  
166 species with no codon cost-efficiency trade-off, such as *Escherichia coli*, there is a  
167 significant negative correlation between  $S_c$  and  $S_t$  (Fig. 3A). Here, the genes that  
168 experienced the greatest selection to maximise efficiency are those that experienced the  
169 greatest selection to minimise biosynthetic cost. The same phenomenon was also observed  
170 for species that exhibit significant codon cost-efficiency trade-offs, such as *Lactobacillus*  
171 *amylophilus* (Fig. 3B). Overall, significant correlations between selection coefficients for  
172 individual genes were observed for 91% of species ( $p < 0.05$ , Fig. 3C). Therefore  
173 irrespective of the extent of the codon cost-efficiency trade-off, selection is performing multi-  
174 objective optimisation of transcript sequences to reduce their biosynthetic cost while  
175 increasing their translational efficiency and thereby reducing resource allocation to mRNA  
176 production.

177 As the most highly expressed genes in a cell comprise the largest proportion of cellular RNA,  
178 the strength of selection experienced by a gene is thought to be dependent on the mRNA

179 abundance of that gene (18, 19). In agreement with this, evaluation of the relative mRNA  
180 abundance of genes in *E. coli* revealed that the most highly expressed genes exhibited the  
181 greatest selection to minimise transcript biosynthetic cost (Fig. 4A) whilst also showing the  
182 strongest selection to maximise transcript translational efficiency (Fig. 4B). Thus, selection  
183 acts in proportion to relative mRNA abundance to perform multi-objective optimisation of  
184 codon bias to minimise resource allocation to transcript sequences through production of  
185 low cost, high efficiency transcripts.

### 186 **Sequence optimisation for cost and efficiency constrains molecular evolution rate**

187 Given that codon choice has been shown to provide a selective advantage per codon per  
188 generation (20), it was hypothesised that the extent to which a transcript is jointly optimised  
189 for codon cost and efficiency would constrain the rate at which the underlying gene  
190 sequence can evolve. Specifically, the more highly optimised a transcript is for both  
191 biosynthetic cost and translational efficiency, the higher the proportion of spontaneous  
192 mutations that would reduce the cost-efficiency optimality of the transcript sequence.  
193 Therefore, spontaneous mutations in highly optimised genes would be more likely to be  
194 disadvantageous than spontaneous mutations in less optimised genes. As deleterious  
195 mutations are lost more rapidly from the population than neutral or advantageous mutations,  
196 the more highly optimised a gene sequence is, the lower its apparent evolutionary rate  
197 should be.

198 To test this hypothesis the complete set of gene sequences from *E.coli* was subject to  
199 stochastic *in silico* mutagenesis and the proportion of single nucleotide mutations that  
200 resulted in reduced transcript cost-efficiency optimality was evaluated. As expected, the  
201 proportion of deleterious mutations increased linearly with transcript sequence optimality.  
202 This effect was seen for both synonymous (Figure 5A) and non-synonymous mutations  
203 (Figure 5B). The effect in non-synonymous mutations is seen because a single base  
204 mutation from an optimal codon encoding one amino acid is unlikely to arrive at an equally



205 optimal or better codon encoding any other amino acid. Thus as expected, the more optimal  
206 a codon is, the less likely a spontaneous mutation will result in a codon with higher optimality  
207 irrespective of whether that codon encodes the same amino acid.

208 The extent to which transcript sequences in *E. coli* were jointly cost-efficiency optimised was  
209 compared to the synonymous ( $K_s$ ) and non-synonymous ( $K_a$ ) mutation rate of that gene  
210 estimated from comparison with *Salmonella enterica*. Consistent with the hypothesis, the  
211 rate of both synonymous ( $K_s$  Figure 5C) and non-synonymous ( $K_a$  Figure 5D) changes were  
212 directly proportional to the extent to which the gene sequence had been optimised by natural  
213 selection for low biosynthetic cost and high translational efficiency (Figure 5A and B). Thus,  
214 the extent to which transcript sequences are jointly optimised for cost and efficiency is  
215 sufficient to explain variation in molecular evolutionary rate between genes within a species.  
216 Moreover, selection-driven cost-efficiency optimality is sufficient to explain the correlation in  
217 rates of synonymous and non-synonymous mutations.

## 218 **Discussion**

219 Codon use is biased across the tree-of-life, with patterns of bias varying both between  
220 species and between genes within the same species. Here we demonstrate that variation in  
221 tRNA content between species creates a corresponding variation in the codon cost-  
222 efficiency trade-off whereby codons that cost the least to biosynthesise are not equally  
223 translationally efficient in all species. We show that irrespective of the codon cost-efficiency  
224 trade-off, natural selection performs multi-objective gene sequence optimisation so that  
225 transcript sequences are optimised to be both low cost and high translational efficiency, and  
226 that the nature of this trade-off constrains the extent of the solution. We demonstrate that  
227 this multi-objective optimisation is dependent on mRNA abundance, such that the transcripts  
228 that comprise the largest proportion of cellular mRNA are those that experience the  
229 strongest selection to be both low cost and high efficiency. Finally, we show that the extent  
230 to which a gene sequence is jointly optimised for reduced transcript cost and enhanced

231 translational efficiency is sufficient to explain the variation in molecular sequence rate of  
232 genes. Furthermore, it is sufficient to explain the previously unexplained phenomenon that  
233 the rate of synonymous and non-synonymous mutation for a gene is correlated (21).

234 Differences in molecular evolution rates between species is thought to be mainly due to  
235 differences in organism generation-time (22). However, differences in evolutionary rates  
236 between genes in the same species lack a complete mechanistic explanation. Prior to the  
237 study presented here it was known that functional constraints of the encoded protein  
238 sequence contribute to the constraint of the rate of non-synonymous changes (23). It had  
239 also been observed that mRNA abundance and patterns of codon bias correlated with the  
240 evolutionary rate of genes (24, 25), and that rates of synonymous and non-synonymous  
241 changes were correlated (21). The study presented here unifies these prior observations  
242 and provides a novel mechanistic explanation for both variation and correlation in molecular  
243 evolution rates of genes. i.e. that stochastic mutations in gene sequences are more likely to  
244 result in deleterious alleles in proportion to the extent to which that gene sequence has been  
245 jointly optimised by natural selection for reduced transcript biosynthetic cost and enhanced  
246 translational efficiency.

247 The novel mechanism provided here also explains the relationship between mRNA  
248 abundance and gene evolutionary rate. Specifically, functional constraints on protein  
249 abundance stipulate the quantity of mRNA required to produce that protein. The more mRNA  
250 that is required, the larger the percentage of total cellular resources that are invested within  
251 that transcript. The mechanism simply entails that the more transcript that is present, the  
252 stronger the selective pressure will be to reduce the cellular resources committed to that  
253 transcript. Importantly, minimising these resources can be achieved both by using codons  
254 that require fewer resources for their biosynthesis, and by utilising translationally efficient  
255 codons that increase the protein to transcript ratio and therefore reduce the amount of  
256 transcript required to produce the same amount of protein. Overall, this study reveals how

257 the economics of gene production is a critical factor determining both the evolution and  
258 composition of genes.

## 259 **Methods**

### 260 **Data sources**

261 1,320 bacterial genomes were obtained from the NCBI ([www.ncbi.nlm.nih.gov](http://www.ncbi.nlm.nih.gov)). In order to  
262 avoid over-sampling of more frequently sequenced genera, the number of species from each  
263 genus was restricted to 5 with a maximum of 1 species for each genus. Therefore, the 1320  
264 species sampled in this study were distributed among 730 different genera. Only genes that  
265 were longer than 30 nucleotides, had no in-frame stop codons, and began and ended with  
266 start and stop codons respectively were analysed. Each species in this analysis contained  
267 a minimum of 500 genes that fit these criteria. Full details of species names, genome  
268 accession numbers, strain details and selection coefficients are provided in Supplementary  
269 Table 1.

### 270 **Evaluation of translational efficiency (tAI)**

271 To obtain the number of tRNA genes in each genome, tRNAscan was run on each of the  
272 1,320 bacterial genomes (26). This (current) version of tRNAscan is unable to distinguish  
273 between tRNA-Met and tRNA-Ile with the anticodon CAT. Thus tRNA-Ile(CAT), while  
274 present, is not detected in any of the genomes. To compensate for this a single copy of  
275 tRNA-Ile with the anticodon CAT was added to the tRNA counts for each species if more  
276 than one tRNA-Met(CAT) was found. The tRNA adaptation index (tAI) (17), which considers  
277 both the tRNA gene copy number and wobble-base pairing when calculating the  
278 translational efficiency of a codon, was evaluated using the optimised  $s_{ij}$  values for bacteria  
279 obtained by Tuller et al (27) and the equation developed by dos Reis et al (28).  $s_{uu}$  was set  
280 to 0.7 as proposed by Navon et al (29) and  $s_{uc}$  was set to 0.95 as U<sub>34</sub> has been shown to  
281 have weak codon-anticodon coupling with cytosine (30). Each species in this analysis was

282 able to translate all codons, was not missing key tRNAs and did not require unusual tRNA-  
283 modifications.

#### 284 **Calculation of relative codon cost and efficiency**

285 Codon biosynthetic cost and translational efficiency were calculated relative to other  
286 synonymous codons such that the synonymous codon with the greatest value had a relative  
287 cost or efficiency of 1. eg. The nitrogen cost of GCC is 11 atoms. The most expensive  
288 synonymous codon is GCG/GCA (13 atoms). Therefore the relative cost of GCC is  $11/13 =$   
289 0.85. The same evaluation was done to calculate codon translational efficiency.

#### 290 **CodonMuSe: A fast and efficient algorithm for evaluating drivers of codon usage bias**

291 The SK model (2) was used to infer the joint contribution of mutation bias, selection acting  
292 on codon biosynthetic cost and selection acting on codon translational efficiency to biased  
293 synonymous codon use. To facilitate large scale comparative application of this model a  
294 rapid, stand-alone version was implemented in python. The algorithm, instructions for use,  
295 and example files are available for download at <https://github.com/easeward/CodonMuSe>.  
296 For each species, the values of  $M_b$ ,  $S_c$  and  $S_t$  were inferred using the complete set of protein  
297 coding genes and tRNA copy number inferred using tRNAscan. Further details about the  
298 algorithm can be found in Supplemental File 1.

#### 299 **Comparing selection acting on codon bias and transcript abundance levels**

300 Transcriptome data for *E. coli* str. K-12 MG1655 were downloaded from NCBI (31). The  
301 three biological replicates for the logarithmic growth phase were available, however the third  
302 replicate was inconsistent with the first two and so was excluded from this analysis. As each  
303 gene had multiple probes, the average probe value for each gene was taken. The three-  
304 parameter CodonMuSe model using the value for  $M_b$  estimated from a genome-wide  
305 analysis was run for each of the 4099 genes in *E. coli* individually, and thus values for  $S_c$

306 and  $S_t$  were obtained for each gene. The values for these selection coefficients were plotted  
307 against relative mRNA abundance data described above (31).

### 308 **Calculating the extent to which gene sequences were jointly optimised for cost and** 309 **efficiency**

310 The extent to which transcript sequences were jointly optimised for both biosynthetic cost  
311 and translational efficiency was approximated by the distance of a given gene to the cost-  
312 efficiency Pareto frontier for that amino acid sequence ( $d_1$ , Supplementary Figure S1). The  
313 cost-efficiency Pareto frontier consists of sequences that are optimised for maximal  
314 transcript translational efficiency and minimal transcript biosynthetic cost such that a gene  
315 that is 100% optimised lies on the frontier (red frontier, Supplementary Figure S1). Genes  
316 that are less than 100% optimised occupy the space between the cost-efficiency Pareto  
317 frontier (red frontier) and the opposite frontier (blue frontier, minimising transcript efficiency  
318 and maximising cost) for that amino acid sequence (Supplementary Figure S1). The percent  
319 optimality of the coding sequence is evaluated as  $\left(\frac{d_4}{d_1+d_4}\right) * 100$  (Supplementary Figure S1).

### 320 **Calculation of molecular evolution rates**

321 Molecular evolutionary rates ( $K_a$  and  $K_s$  values) were calculated for orthologous genes in *E.*  
322 *coli* and *S. enterica*. 2,468 single-copy orthologous genes were identified for *E. coli* and *S.*  
323 *enterica* using OrthoFinder v1.1.4 (32). These sequences were aligned at the amino acid-  
324 level using MergeAlign (33) and this alignment was then re-threaded with the coding  
325 sequences to create codon-level nucleotide alignments. Only aligned sequences longer  
326 than 30 nucleotides with less than 10% gaps were used. Gapped regions were removed  
327 and KaKs\_Calculator 2.0 (34) was run using the GMYN model to evaluate  $K_a$  and  $K_s$  values  
328 for each pair of aligned nucleotide sequences. As the molecular evolution rates represent  
329 the average of the mutation rates of the gene-pair since they last shared a common

330 ancestor, these rates were compared to the average optimality of the same gene-pair in  
331 both species.

### 332 **Acknowledgements**

333 EAS is supported by a BBSRC studentship through BB/J014427/1. SK is a Royal Society  
334 University Research Fellow. Work in SK's lab is supported by the European Union's Horizon  
335 2020 research and innovation programme under grant agreement number 637765.

### 336 **Competing interests**

337 The authors declare that they have no competing interests.

### 338 **Author contributions**

339 SK and EAS conceived the study, EAS conducted the analysis, EAS and SK wrote the  
340 manuscript. Both authors read and approved the final manuscript.

### 341 **References**

- 342 1. FARMER IS, JONES CW (1976) The Energetics of Escherichia coli during Aerobic  
343 Growth in Continuous Culture. *Eur J Biochem* 67(1):115–122.
- 344 2. Seward EA, Kelly S (2016) Dietary nitrogen alters codon bias and genome  
345 composition in parasitic microorganisms. *Genome Biol* 17(1):226.
- 346 3. Chen W-H, Guanting L, Peer B, Songnian H, Martin J. L (2016) Energy efficiency  
347 trade-offs drive nucleotide usage in transcribed regions. *Nat comminications* 7:1–10.
- 348 4. Horn D (2008) Codon usage suggests that translational selection has a major impact  
349 on protein expression in trypanosomatids. *BMC Genomics* 9:2.
- 350 5. Rocha EPC (2004) Codon usage bias from tRNA's point of view: Redundancy,  
351 specialization, and efficient decoding for translation optimization. *Genome Res*  
352 14:2279–2286.
- 353 6. Sørensen M a, Kurland CG, Pedersen S (1989) Codon usage determines translation  
354 rate in Escherichia coli. *J Mol Biol* 207(2):365–377.
- 355 7. Hu H, et al. (2013) Codon Optimization Significantly Improves the Expression Level  
356 of a Keratinase Gene in Pichia pastoris. *PLoS One* 8(3).  
357 doi:10.1371/journal.pone.0058393.
- 358 8. Akashi H (1994) Synonymous codon usage in Drosophila melanogaster: Natural  
359 selection and translational accuracy. *Genetics* 136(3):927–935.
- 360 9. Shah P, Gilchrist M a (2011) Explaining complex codon usage patterns with selection

- 361 for translational efficiency, mutation bias, and genetic drift. *Proc Natl Acad Sci U S A*  
362 108(25):10231–10236.
- 363 10. Precup J, Parker J (1987) Missense misreading of asparagine codons as a function  
364 of codon identity and context. *J Biol Chem* 262(23):11351–11355.
- 365 11. Lao PJ, Forsdyke DR (2000) Thermophilic bacteria strictly obey Szybalski's  
366 transcription direction rule and politely purine-load RNAs with both adenine and  
367 guanine. *Genome Res* 10(2):228–236.
- 368 12. Paz A, Mester D, Baca I, Nevo E, Korol A (2004) Adaptive role of increased frequency  
369 of polypurine tracts in mRNA sequences of thermophilic prokaryotes. *Proc Natl Acad*  
370 *Sci U S A* 101(9):2951–2956.
- 371 13. Eskesen ST, Eskesen FN, Ruvinsky A (2004) Natural selection affects frequencies of  
372 AG and GT dinucleotides at the 5' and 3' ends of exons. *Genetics* 167(1):543–550.
- 373 14. Novoa EM, Ribas de Pouplana L (2012) Speeding with control: Codon usage, tRNAs,  
374 and ribosomes. *Trends Genet* 28(11):574–581.
- 375 15. Zhang F, Saha S, Shabalina SA, Kashina A (2010) Differential Arginylation of Actin  
376 Isoforms Is Regulated by Coding Sequence-Dependent Degradation. *Science (80- )*  
377 329(5998):1534–1537.
- 378 16. Grosjean H, de Crécy-Lagard V, Marck C (2010) Deciphering synonymous codons in  
379 the three domains of life: Co-evolution with specific tRNA modification enzymes. *FEBS*  
380 *Lett* 584(2):252–264.
- 381 17. dos Reis M, Wernisch L, Savva R (2003) Unexpected correlations between gene  
382 expression and codon usage bias from microarray data for the whole *Escherichia coli*  
383 K-12 genome. *Nucleic Acids Res* 31(23):6976–6985.
- 384 18. Ran W, Higgs PG (2012) Contributions of Speed and Accuracy to Translational  
385 Selection in Bacteria. *PLoS One* 7(12). doi:10.1371/journal.pone.0051652.
- 386 19. Drummond DA, Wilke CO (2009) The evolutionary consequences of erroneous protein  
387 synthesis. *Nat Rev Genet* 10(10):715–724.
- 388 20. Brandis G, Hughes D (2016) The Selective Advantage of Synonymous Codon Usage  
389 Bias in *Salmonella*. *PLOS Genet* 12(3):e1005926.
- 390 21. Sharp PM (1991) Determinants of DNA sequence divergence between *Escherichia*  
391 *coli* and *Salmonella typhimurium*: Codon usage, map position, and concerted  
392 evolution. *J Mol Evol* 33(1):23–33.
- 393 22. Weller C, Wu M (2015) A generation-time effect on the rate of molecular evolution in  
394 bacteria. *Evolution (N Y)* 69(3):643–652.
- 395 23. Zuckerkandl E (1976) Evolutionary processes and evolutionary noise at the molecular  
396 level. I. Functional Density in Proteins. *J Mol Evol* 7:167–183.
- 397 24. Sharp PM, Li WH (1987) The rate of synonymous substitution in enterobacterial genes  
398 is inversely related to codon usage bias. *Mol Biol Evol* 4(3):222–230.

- 399 25. Drummond DA, Raval A, Wilke CO (2006) A single determinant dominates the rate of  
400 yeast protein evolution. *Mol Biol Evol* 23(2):327–337.
- 401 26. Schattner P, Brooks AN, Lowe TM (2005) The tRNAscan-SE, snoscan and snoGPS  
402 web servers for the detection of tRNAs and snoRNAs. *Nucleic Acids Res* 33(SUPPL.  
403 2):686–689.
- 404 27. Sabi R, Tuller T (2014) Modelling the Efficiency of Codon – tRNA Interactions Based  
405 on Codon Usage Bias. *DNA Res* 21(June):511–525.
- 406 28. dos Reis M, Savva R, Wernisch L (2004) Solving the riddle of codon usage  
407 preferences: A test for translational selection. *Nucleic Acids Res* 32(17):5036–5044.
- 408 29. Navon S, Pilpel Y (2011) The role of codon selection in regulation of translation  
409 efficiency deduced from synthetic libraries. *Genome Biol* 12(2):R12.
- 410 30. Näsvall SJ, Chen P, Björk GR (2004) The modified wobble nucleoside uridine-5-  
411 oxyacetic acid in tRNA Pro cmo 5 UGG promotes reading of all four proline codons in  
412 vivo The modified wobble nucleoside uridine-5-oxyacetic acid in tRNA Pro cmo UGG  
413 promotes reading of all four proline codons in vi. 1662–1673.
- 414 31. Cho B-K, et al. (2009) Elucidation of the transcription unit architecture of the  
415 Escherichia coli K-12 MG1655 genome. *Nat Biotechnol* 27(11):1043–1049.
- 416 32. Emms DM, Kelly S (2015) OrthoFinder: solving fundamental biases in whole genome  
417 comparisons dramatically improves orthogroup inference accuracy. *Genome Biol*  
418 16(1):157.
- 419 33. Collingridge PW, Kelly S (2012) MergeAlign: improving multiple sequence alignment  
420 performance by dynamic reconstruction of consensus multiple sequence alignments.  
421 *BMC Bioinformatics* 13:117.
- 422 34. Wang D, Zhang Y, Zhang Z, Zhu J, Yu J (2010) KaKs\_Calculator 2.0: A Toolkit  
423 Incorporating Gamma-Series Methods and Sliding Window Strategies. *Genomics,  
424 Proteomics Bioinforma* 8(1):77–80.
- 425
- 426



427 **Figures**

428

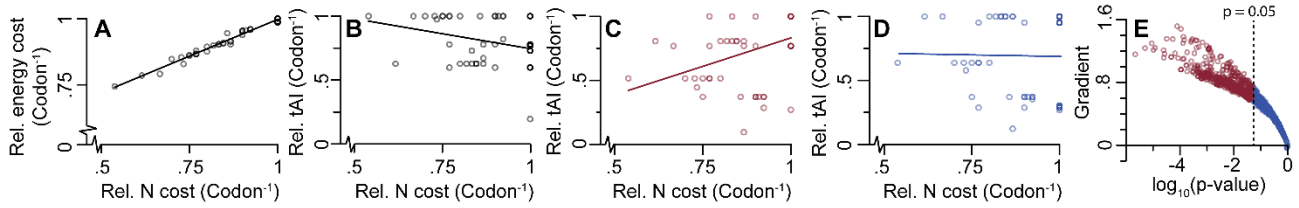

429 **Fig. 1.**

430 Different tRNA sparing strategies alter a species' codon cost-efficiency trade-off. **A)** Codon  
431 nitrogen cost (N cost) correlates almost perfectly with codon energetic cost ( $p < 0.05$ ,  $y =$   
432  $0.6x + 0.44$ ,  $R^2 = 0.98$ ). **B)** A full complement of tRNAs has a negative correlation between  
433 codon biosynthetic cost and translational efficiency (tAI) ( $p < 0.05$ ,  $y = -0.5x + 1.21$ ,  $R^2 =$   
434  $0.10$ ). **C)** tRNA sparing strategy 1 (NNU codons translated by GNN anticodons) has a  
435 positive correlation between codon biosynthetic cost and translational efficiency ( $p < 0.05$ ,  $y$   
436  $= 0.9x - 0.06$ ,  $R^2 = 0.18$ ). **D)** tRNA sparing strategy 2 (strategy 1 + NNG codons translated  
437 by UNN anticodons) has no significant correlation between codon biosynthetic cost and  
438 translational efficiency ( $p > 0.05$ ,  $y = 0.74$ ,  $R^2 = 0$ ). **E)** The 1,320 bacterial species in this  
439 analysis can be categorised into those with a significant codon cost-efficiency trade-off ( $p <$   
440  $0.05$ , red) and those with no trade-off ( $p > 0.05$ , blue). The y-axis is the gradient of the line of  
441 best fit between codon biosynthetic cost and translational efficiency.

442

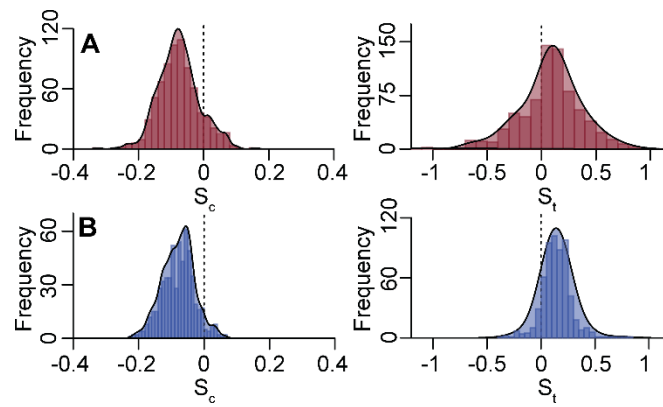

443

444 **Fig. 2.**

445 Bacterial genomes show selection to minimise nucleotide cost ( $-S_c$ ) and maximise  
446 translational efficiency ( $+S_t$ ). **A)** Genome-wide  $S_c$  and  $S_t$  values for the 726 species with a  
447 codon cost-efficiency trade-off. **B)** Genome-wide  $S_c$  and  $S_t$  values for the 594 species with  
448 no codon cost-efficiency trade-off.

449

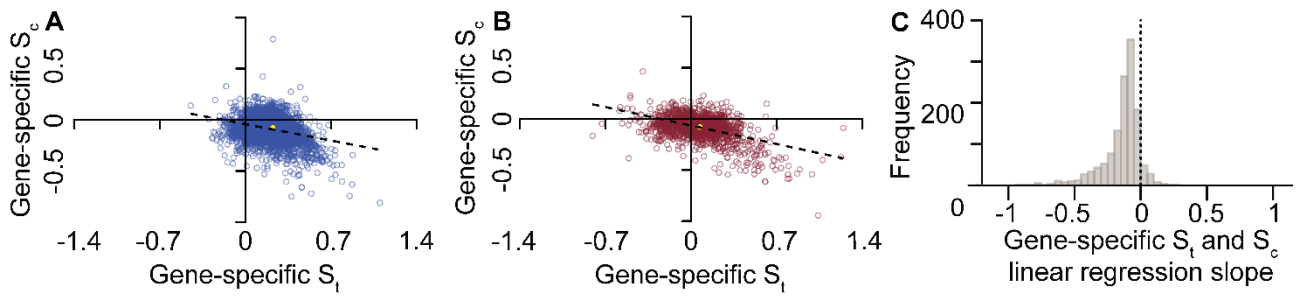

450

451 **Fig. 3.**

452 The genes under the strongest selection for translational efficiency (+ $S_t$ ) are also under the  
453 strongest selection to minimise nucleotide cost (- $S_c$ ). Scatterplots of gene-specific  $S_t$  and  $S_c$   
454 values for **A) *Escherichia coli*** **B) *Lactobacillus amylophilus***. In both cases the line of best fit  
455 is shown and the yellow dot is the genome-wide best-fit value for each species. **C)** Histogram  
456 of the slope between  $S_c$  and  $S_t$  for individual genes for each of the 1,320 species in this  
457 analysis.

458

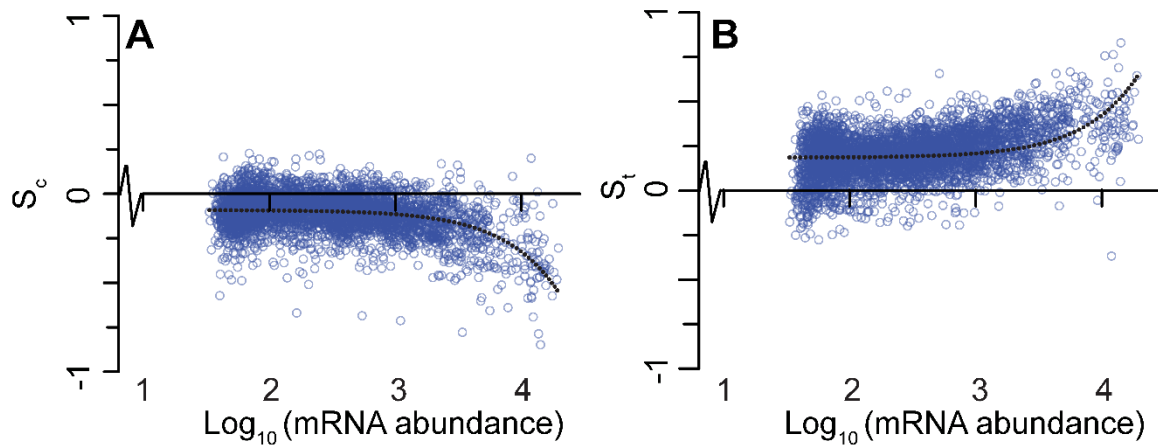

459

460 **Fig. 4.**

461 Selection acts in proportion to mRNA abundance to decrease codon biosynthetic cost and  
462 increase codon translational efficiency in *Escherichia coli*. **A)** There is a negative correlation  
463 between selection acting on codon biosynthetic cost ( $S_c$ ) and mRNA abundance. The line  
464 of best fit has an  $R^2$  value of 0.18. **B)** There is a positive correlation between selection acting  
465 to increase codon translational efficiency ( $S_t$ ) and gene expression. The line of best fit has  
466 an  $R^2$  value of 0.13.

467

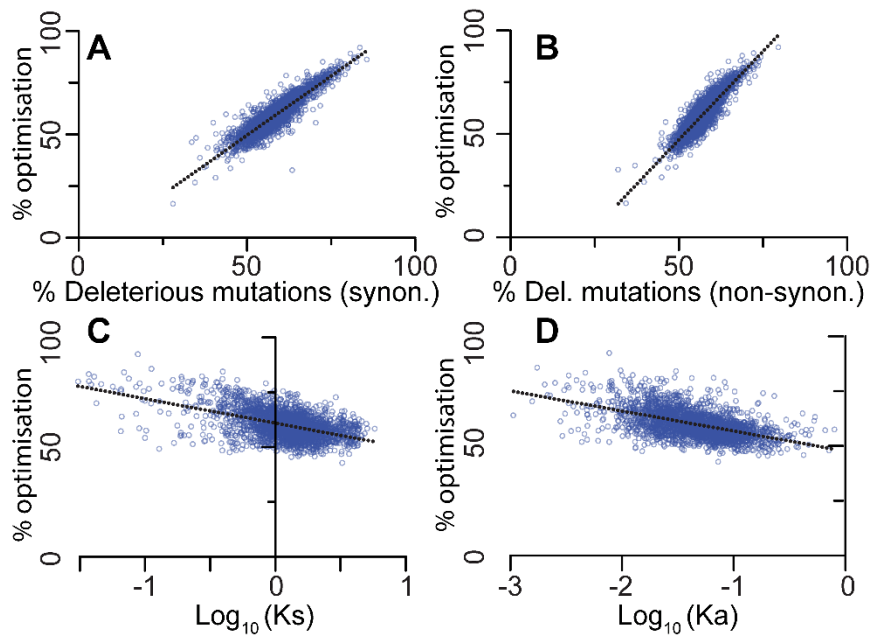

468

469 **Fig. 5.**

470 Selection-driven optimisation of resource allocation is a critical factor that determines  
471 molecular evolution rate. Highly cost-efficiency optimised genes have a higher proportion of  
472 deleterious **A)** synonymous ( $y = 1.15x - 8$ ,  $R^2 = 0.81$ ) and **B)** non-synonymous ( $y = 1.71x -$   
473  $38$ ,  $R^2 = 0.78$ ) mutations. Orthologous genes in *Escherichia coli* and *Salmonella enterica*  
474 show a negative correlation between sequence cost-efficiency optimisation and the rate of  
475 **C)** synonymous mutations ( $K_s$ ) ( $y = -11x + 61$ ,  $R^2 = 0.26$ ) and **D)** non-synonymous mutation  
476 ( $K_a$ ) ( $y = -9x + 48$ ,  $R^2 = 0.28$ ).

477

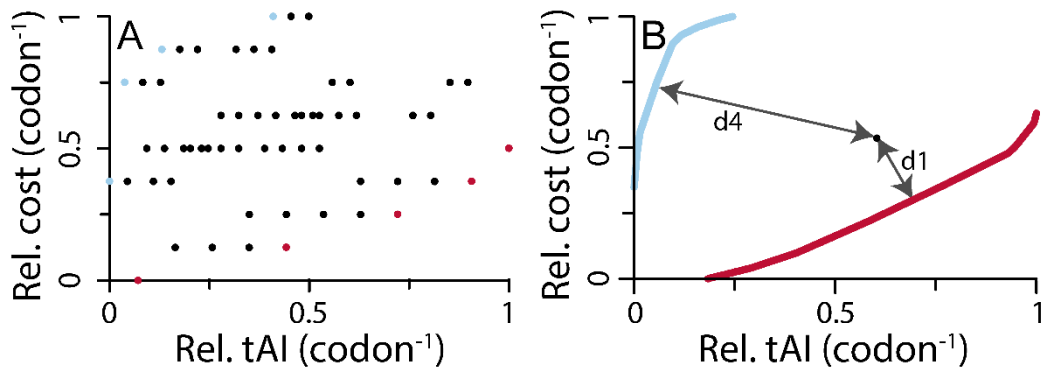

478

### 479 **Figure S1**

480 Example cost-efficiency Pareto frontier for a short amino acid sequence. **A)** Scatter plot of  
481 the 64 possible coding sequences encoding the amino acid sequence MTGCD. Red dots  
482 indicate coding sequences that are positioned on the best cost-efficiency Pareto frontier (the  
483 least expensive most translationally efficient sequences possible). Blue dots indicate coding  
484 sequences that are positioned on the worst cost-efficiency Pareto frontier (the most  
485 expensive least translationally efficient sequences possible). **B)** Evaluating the cost-  
486 efficiency optimality of a coding sequence. d1 is the minimum distance between a given  
487 coding sequence and the best cost-efficiency Pareto frontier (red) for that amino acid  
488 sequence. d4 is the minimum distance of the same gene to the worse cost-efficiency Pareto  
489 frontier for that amino acid sequence (blue). The percent optimality of the coding sequence  
490 is evaluated as  $\left(\frac{d4}{d1+d4}\right) * 100$ .

### 491 **Supplementary Table S1**

492 Full details of species names, genome accession numbers, strain details and selection  
493 coefficients.

494
